# Supplementary material for: Translation of evidence into kidney transplant clinical practice: managing drug-lab interactions by a context-aware clinical decision support system
Source: PubMed Central journal article supplement (PMC7439664; doi:10.1186/s12911-020-01196-w), 2020-08-20

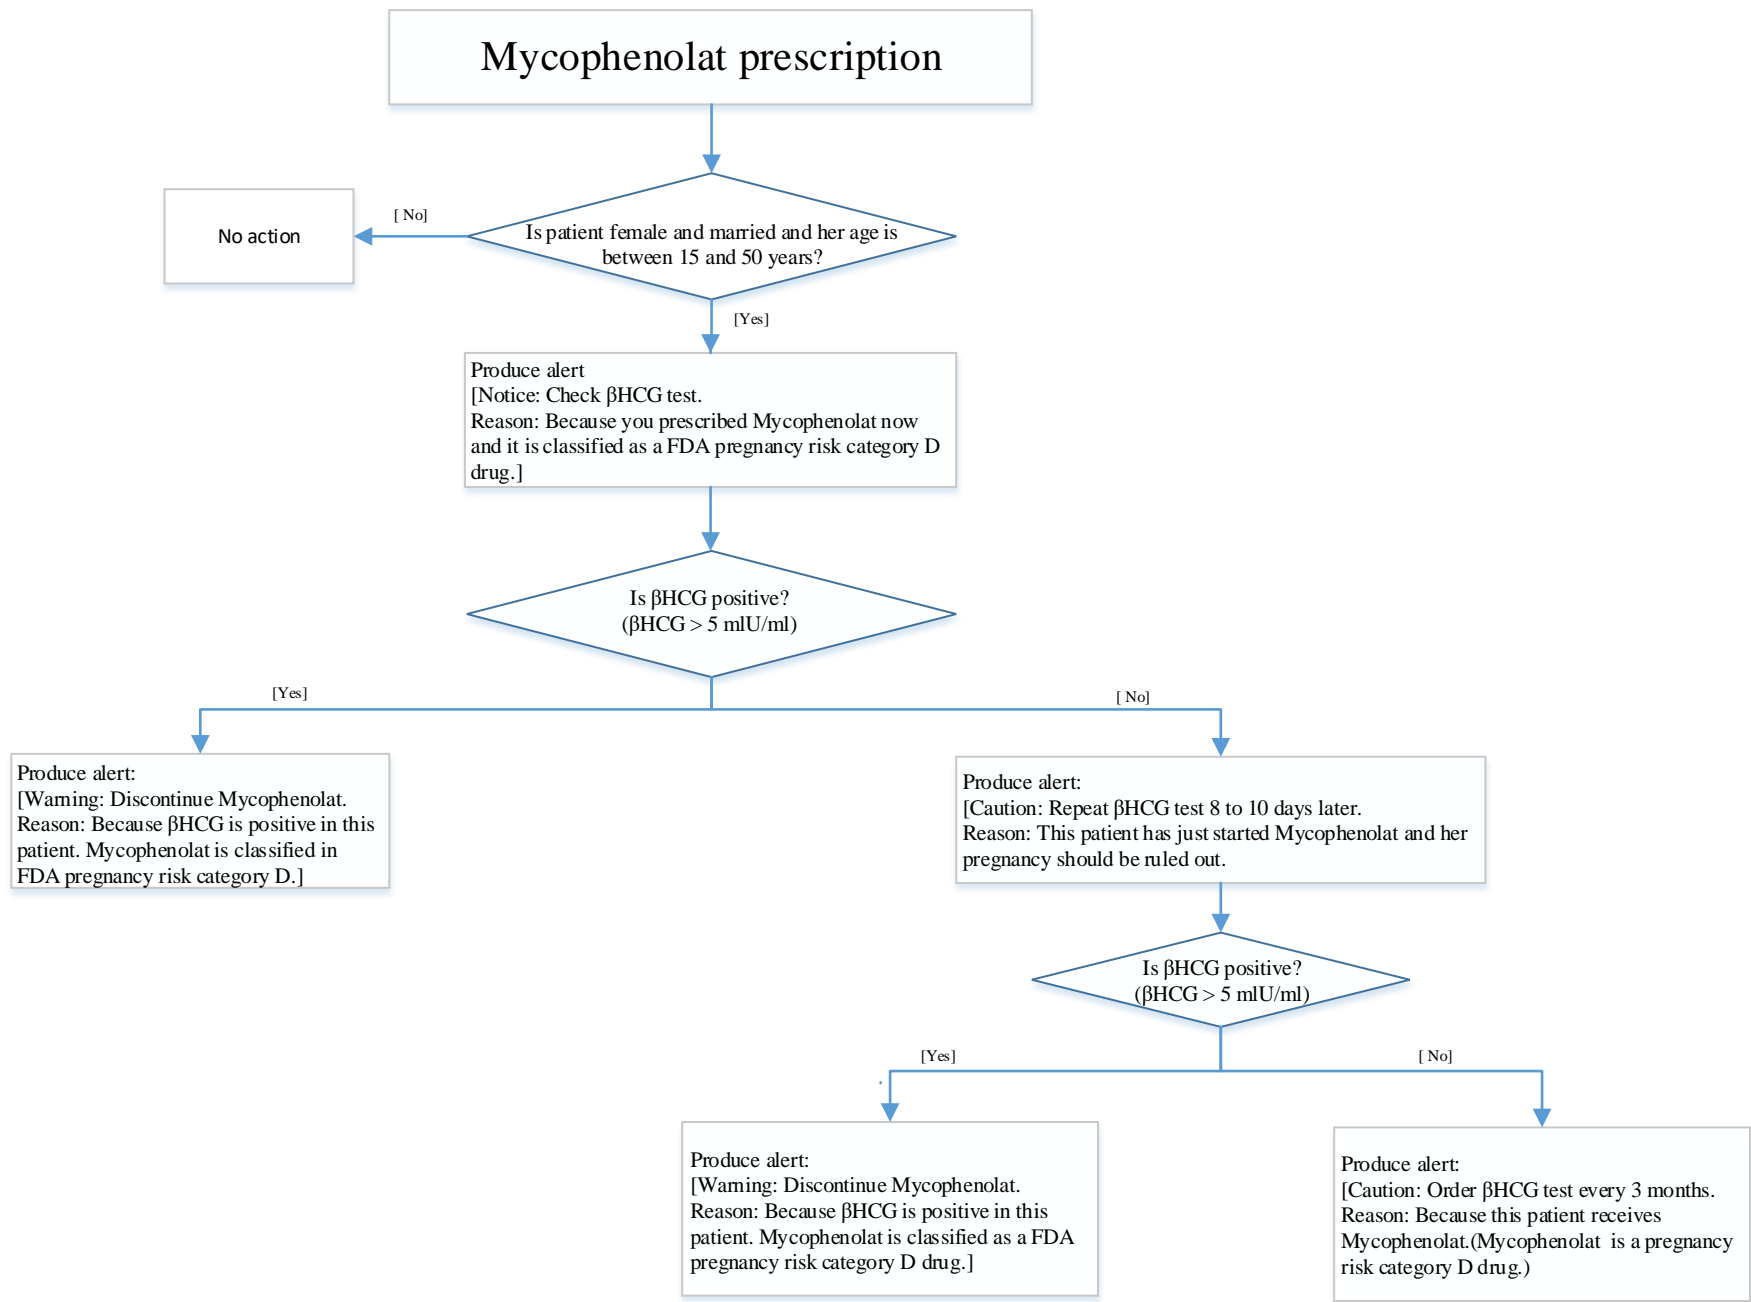

Supplement: 12911_2020_1196_MOESM5_ESM.pdf [file 12911_2020_1196_MOESM5_ESM.pdf]
